# Supplementary material for: Quantification of total fatty acids in microalgae: comparison of extraction and transesterification methods
Source: PubMed Central journal article supplement (PMC4206773; doi:10.1007/s00216-014-8155-3), 2014-09-16
Supplement: 216_2014_8155_MOESM1_ESM.pdf [file 216_2014_8155_MOESM1_ESM.pdf]

**Analytical and Bioanalytical Chemistry**

**Electronic Supplementary Material**

**Quantification of total fatty acids in microalgae: comparison of extraction and transesterification methods**

Lillie R Cavonius, Nils-Gunnar Carlsson, Ingrid Undeland

**Table S1** Individual fatty acids expressed as mg/g dry weight in *Isochrysis galbana*; first row shows the mean, the second the standard deviation. Methods, in order of appearance: Bligh & Dyer; acidified Bligh & Dyer; acidified Bligh & Dyer, overnight; Lee et al.; Griffiths et al.'s full method; in-house KOH method; short version of Griffiths et al.' method with boron trifluoride; Christie's method; Lewis et al.'s method; "HCl" = in-house acetyl chloride in methanol; in-house acetyl chloride in methanol, overnight. SFA = saturated fatty acid, MUFA = monounsaturated fatty acid, PUFA = polyunsaturated fatty acid

| method                           | n  | sum | C14:0 | C16:0 | C16:1 n7 | C16:2 n4 | C18:0 | C18:1 n9 | C18:1 n7 | C18:2 n6 | C18:3 n3 | C18:4 n3 | C20:1 | C20:4 n6 | C20:5 n3 | C22:0 | C22:5 n6 | C22:6 n3 |
|----------------------------------|----|-----|-------|-------|----------|----------|-------|----------|----------|----------|----------|----------|-------|----------|----------|-------|----------|----------|
|                                  |    |     | SFA   | SFA   | MUFA     | PUFA     | SFA   | MUFA     | MUFA     | PUFA     | PUFA     | PUFA     | PUFA  | MUFA     | PUFA     | PUFA  | SFA      | PUFA     |
| <b>Bligh &amp; Dyer</b>          | 3  | 116 | 20    | 11    | 5,7      | 0,7      | 0,3   | 18       | 1,3      | 7,0      | 14       | 17       | 5,4   | 0,1      | 0,6      | 0,1   | 1,7      | 14       |
|                                  |    | 2,5 | 0,8   | 0,2   | 0,13     | 0,02     | 0,01  | 0,3      | 0,03     | 0,1      | 0,2      | 0,3      | 0,1   | 0,03     | 0,02     | 0,03  | 0,02     | 0,02     |
| <b>B&amp;D, acid</b>             | 3  | 118 | 20    | 11    | 5,9      | 0,7      | 0,3   | 18       | 1,4      | 7,2      | 15       | 17       | 5,5   | 0,1      | 0,6      | 0,1   | 1,7      | 13       |
|                                  |    | 1,2 | 1,0   | 0,1   | 0,05     | 0,00     | 0,00  | 0,3      | 0,02     | 0,1      | 0,2      | 0,2      | 0,1   | 0,02     | 0,02     | 0,02  | 0,02     | 0,1      |
| <b>B&amp;D, 24 hrs, acid</b>     | 3  | 118 | 20    | 11    | 5,8      | 0,7      | 0,3   | 18       | 1,4      | 7,1      | 15       | 17       | 5,6   | 0,1      | 0,6      | 0,1   | 1,7      | 13       |
|                                  |    | 1,5 | 0,1   | 0,2   | 0,07     | 0,02     | 0,00  | 0,3      | 0,03     | 0,1      | 0,2      | 0,2      | 0,1   | 0,02     | 0,02     | 0,04  | 0,1      | 0,3      |
| <b>Lee et al.</b>                | 3  | 117 | 19    | 11    | 5,6      | 0,6      | 0,4   | 19       | 1,3      | 7,1      | 15       | 17       | 5,8   | 0,1      | 0,5      | 0,1   | 1,6      | 14       |
|                                  |    | 3,0 | 0,5   | 0,8   | 0,09     | 0,02     | 0,2   | 1,8      | 0,05     | 0,1      | 0,2      | 0,2      | 0,2   | 0,1      | 0,02     | 0,01  | 0,1      | 0,2      |
| <b>Griffiths et al.</b>          | 3  | 121 | 22    | 13    | 6,1      | 0,7      | 0,3   | 18       | 1,4      | 7,5      | 14       | 17       | 3,9   | 0,1      | 0,6      | 0,1   | 1,8      | 14       |
|                                  |    | 0,7 | 0,3   | 0,3   | 0,03     | 0,04     | 0,01  | 0,4      | 0,05     | 0,0      | 0,3      | 0,9      | 0,0   | 0,04     | 0,07     | 0,07  | 0,02     | 0,4      |
| <b>KOH</b>                       | 3  | 121 | 20    | 14    | 6,1      | 0,7      | 0,4   | 19       | 1,4      | 7,7      | 15       | 19       | 2,1   | 0,3      | 0,5      | 0,2   | 1,7      | 13       |
|                                  |    | 1,1 | 0,3   | 0,1   | 0,08     | 0,02     | 0,04  | 0,2      | 0,02     | 0,2      | 0,2      | 0,2      | 0,05  | 0,03     | 0,02     | 0,07  | 0,1      | 0,03     |
| <b>Griffiths, BF<sub>3</sub></b> | 3  | 121 | 21    | 12    | 5,9      | 0,7      | 0,3   | 17       | 1,3      | 7,3      | 15       | 18       | 5,6   | 0,1      | 0,6      | 0,1   | 1,7      | 14       |
|                                  |    | 1,9 | 0,6   | 0,2   | 0,06     | 0,01     | 0,01  | 0,2      | 0,02     | 0,04     | 0,1      | 0,3      | 0,1   | 0,02     | 0,01     | 0,01  | 0,04     | 0,4      |
| <b>Christie</b>                  | 3  | 128 | 22    | 13    | 6,4      | 0,7      | 0,3   | 18       | 1,4      | 7,6      | 15       | 19       | 5,7   | 0,1      | 0,6      | 0,1   | 1,7      | 16       |
|                                  |    | 2,7 | 0,4   | 0,2   | 0,08     | 0,00     | 0,01  | 0,2      | 0,01     | 0,1      | 0,2      | 0,3      | 0,03  | 0,04     | 0,03     | 0,03  | 0,1      | 2,9      |
| <b>Lewis et al.</b>              | 3  | 126 | 22    | 13    | 6,1      | 0,7      | 0,3   | 18       | 1,3      | 7,7      | 15       | 19       | 5,9   | 0,1      | 0,6      | 0,1   | 1,8      | 15       |
|                                  |    | 1,7 | 0,5   | 0,2   | 0,07     | 0,01     | 0,01  | 0,2      | 0,01     | 0,3      | 0,2      | 0,2      | 0,1   | 0,01     | 0,01     | 0,06  | 0,01     | 0,3      |
| <b>HCl</b>                       | 12 | 126 | 22    | 13    | 6,3      | 0,7      | 0,3   | 18       | 1,4      | 7,6      | 15       | 19       | 5,1   | 0,1      | 0,6      | 0,1   | 1,7      | 14       |
|                                  |    | 4,7 | 1,1   | 0,5   | 0,2      | 0,01     | 0,01  | 0,6      | 0,04     | 0,2      | 0,5      | 0,8      | 1,6   | 0,04     | 0,1      | 0,1   | 0,1      | 0,5      |
| <b>HCl, 24</b>                   | 3  | 122 | 21    | 13    | 6,1      | 0,7      | 0,3   | 18       | 1,3      | 7,4      | 15       | 18       | 5,6   | 0,1      | 0,6      | 0,1   | 1,7      | 14       |
|                                  |    | 1,4 | 0,2   | 0,1   | 0,07     | 0,01     | 0,01  | 0,2      | 0,02     | 0,1      | 0,2      | 0,2      | 0,1   | 0,1      | 0,05     | 0,1   | 0,03     | 0,4      |

**Table S2** Individual fatty acids expressed as mg/g dry weight in *Nannochloropsis oculata*; first row shows the mean, the second the standard deviation. Methods, in order of appearance: Bligh & Dyer; acidified Bligh & Dyer; acidified Bligh & Dyer, overnight; Lee et al.; Griffiths et al.'s full method; in-house KOH method; short version of Griffiths et al.' method with boron trifluoride; Christie's method; Lewis et al.'s method; "HCl" = in-house acetyl chloride in methanol; in-house acetyl chloride in methanol, overnight. SFA = saturated fatty acid, MUFA = monounsaturated fatty acid, PUFA = polyunsaturated fatty acid

| method                           | n  | sum | C14:0 | C16:0 | C16:1 n7 | C18:0 | C18:1 n9 | C18:1 n7 | C18:2 n6 | C18:3 n3 | C20:4 n6 | C20:5 n3 |
|----------------------------------|----|-----|-------|-------|----------|-------|----------|----------|----------|----------|----------|----------|
|                                  |    |     | SFA   | SFA   | MUFA     | SFA   | MUFA     | MUFA     | PUFA     | PUFA     | PUFA     | PUFA     |
| <b>Bligh &amp; Dyer</b>          | 3  | 106 | 5,4   | 25    | 32       | 0,3   | 6,4      | 0,6      | 4,9      | 0,7      | 6,7      | 24       |
|                                  |    | 9   | 0,5   | 2,1   | 2,7      | 0,0   | 0,6      | 0,0      | 0,4      | 0,07     | 0,7      | 2,4      |
| <b>B&amp;D, acid</b>             | 3  | 83  | 4,4   | 18    | 25       | 0,3   | 5,2      | 0,4      | 3,9      | 0,5      | 5,4      | 19       |
|                                  |    | 2   | 0,5   | 0,4   | 0,7      | 0,0   | 0,0      | 0,0      | 0,0      | 0,02     | 0,0      | 0,1      |
| <b>B&amp;D, 24 hrs, acid</b>     | 3  | 89  | 4,6   | 20    | 26       | 0,3   | 5,5      | 0,5      | 4,3      | 0,5      | 6,1      | 22       |
|                                  |    | 0   | 0,1   | 0,1   | 0,2      | 0,0   | 0,1      | 0,0      | 0,0      | 0,02     | 0,0      | 0,2      |
| <b>Lee et al.</b>                | 3  | 88  | 3,9   | 22    | 24       | 0,9   | 8,7      | 0,6      | 3,5      | 0,5      | 5,1      | 19       |
|                                  |    | 13  | 0,3   | 5,0   | 0,8      | 1,1   | 7,0      | 0,2      | 0,1      | 0,03     | 0,1      | 0,4      |
| <b>Griffiths et al.</b>          | 3  | 126 | 6,1   | 31    | 37       | 0,4   | 7,3      | 0,6      | 5,4      | 0,7      | 8,7      | 28       |
|                                  |    | 1,5 | 0,1   | 0,4   | 0,5      | 0,01  | 0,1      | 0,03     | 0,1      | 0,01     | 0,1      | 0,3      |
| <b>KOH</b>                       | 3  | 125 | 5,9   | 31    | 37       | 0,4   | 7,1      | 0,6      | 5,5      | 0,7      | 8,5      | 29       |
|                                  |    | 2,0 | 0,2   | 0,6   | 0,7      | 0,01  | 0,1      | 0,01     | 0,2      | 0,01     | 0,05     | 0,2      |
| <b>Griffiths, BF<sub>3</sub></b> | 3  | 112 | 5,2   | 27    | 33       | 0,3   | 6,2      | 0,5      | 4,8      | 0,7      | 7,6      | 27       |
|                                  |    | 0,4 | 0,1   | 0,3   | 0,5      | 0,01  | 0,1      | 0,01     | 0,04     | 0,02     | 0,1      | 0,2      |
| <b>Christie</b>                  | 3  | 121 | 5,7   | 29    | 35       | 0,4   | 7,0      | 0,3      | 5,3      | 0,7      | 8,4      | 29       |
|                                  |    | 1,6 | 0,1   | 0,4   | 0,3      | 0,01  | 0,1      | 0,3      | 0,1      | 0,03     | 0,2      | 0,4      |
| <b>Lewis et al.</b>              | 3  | 122 | 7,2   | 29    | 35       | 0,4   | 6,9      | 0,6      | 5,2      | 0,7      | 8,5      | 29       |
|                                  |    | 1,8 | 0,1   | 0,3   | 0,7      | 0,01  | 0,1      | 0,01     | 0,1      | 0,04     | 0,1      | 0,7      |
| <b>HCl</b>                       | 12 | 126 | 6,4   | 30    | 37       | 0,4   | 7,1      | 0,6      | 5,4      | 0,7      | 8,7      | 29       |
|                                  |    | 5,5 | 0,3   | 1,4   | 1,9      | 0,02  | 0,3      | 0,03     | 0,2      | 0,0      | 0,4      | 1,5      |
| <b>HCl, 24</b>                   | 3  | 120 | 5,8   | 29    | 35       | 0,4   | 6,9      | 0,6      | 5,3      | 0,7      | 8,5      | 28       |
|                                  |    | 2,5 | 0,2   | 0,6   | 0,6      | 0,02  | 0,2      | 0,02     | 0,1      | 0,05     | 0,2      | 0,6      |

**Table S3** Individual fatty acids expressed as mg/g dry weight in *Phaeodactylum tricornutum*; first row shows the mean, the second the standard deviation. SFA = saturated fatty acid, MUFA = monounsaturated fatty acid, PUFA = polyunsaturated fatty acid. Methods, in order of appearance: Bligh & Dyer *NB* concentrations falsely high, due to insufficient extraction of internal standard; acidified Bligh & Dyer; acidified Bligh & Dyer, overnight; Lee et al.; Griffiths et al.’s full method; in-house KOH method; short version of Griffiths et al.’ method with boron trifluoride; Christie’s method; Lewis et al.’s method; “HCl” = in-house acetyl chloride in methanol; in-house acetyl chloride in methanol, overnight. Where “N/A” appears, the samples were unsuccessfully spiked with C22:6 n3, making it impossible to reconstruct the original concentration; C22:6 n3 was not included in the sum in any of the methods

| method                           | n  | sum | C14:0 | C16:0 | C16:1 n7 | C16:2 n4 | C16:3 n4 | C18:0 | C18:1 n9 | C18:1 n7 | C18:2 n6 | C20:4 n6 | C20:4 n3 | C20:5 n3 | C22:6 n3 | C24:0 |
|----------------------------------|----|-----|-------|-------|----------|----------|----------|-------|----------|----------|----------|----------|----------|----------|----------|-------|
|                                  |    |     | SFA   | SFA   | MUFA     | PUFA     | PUFA     | SFA   | MUFA     | MUFA     | PUFA     | PUFA     | PUFA     | PUFA     | PUFA     | PUFA  |
| <b>Bligh &amp; Dyer NB</b>       | 3  | 87  | 6,2   | 13,9  | 16,5     | 3,1      | 9,3      | 0,4   | 0,8      | 1,4      | 1,6      | 1,1      | 0,5      | 31       | N/A      | 0,8   |
|                                  |    | 8,5 | 0,6   | 1,4   | 1,7      | 0,28     | 1,0      | 0,06  | 0,06     | 0,16     | 0,18     | 0,07     | 0,04     | 3,1      |          | 0,1   |
| <b>B&amp;D, acid</b>             | 3  | 47  | 3,1   | 7,5   | 9,3      | 1,8      | 5,4      | 0,2   | 0,4      | 0,8      | 0,9      | 0,6      | 0,2      | 17       | 1,0      | 0,1   |
|                                  |    | 1,2 | 0,1   | 0,4   | 0,1      | 0,04     | 0,1      | 0,02  | 0,05     | 0,05     | 0,03     | 0,02     | 0,1      | 0,2      | 0,1      | 0,2   |
| <b>B&amp;D, 24 hrs, acid</b>     | 3  | 54  | 4,1   | 8,6   | 11       | 2,0      | 6,2      | 0,3   | 0,5      | 0,8      | 1,0      | 0,7      | 0,3      | 19       | 1,1      | 0,3   |
|                                  |    | 1,0 | 0,1   | 0,2   | 0,2      | 0,04     | 0,1      | 0,01  | 0,02     | 0,02     | 0,03     | 0,01     | 0,01     | 0,3      | 0,02     | 0,1   |
| <b>Lee et al.</b>                | 3  | 35  | 2,5   | 5,3   | 7,0      | 1,4      | 4,4      | 0,2   | 0,3      | 0,5      | 0,6      | 0,3      | 0,2      | 13       | N/A      | 0,2   |
|                                  |    | 1,0 | 0,05  | 0,1   | 0,2      | 0,03     | 0,1      | 0,01  | 0,02     | 0,02     | 0,02     | 0,02     | 0,01     | 0,01     | 0,5      |       |
| <b>Griffiths et al.</b>          | 3  | 56  | 4,4   | 11    | 11       | 1,9      | 5,4      | 0,3   | 0,5      | 0,9      | 1,0      | 0,7      | 0,3      | 18       | N/A      | 0,9   |
|                                  |    | 0,9 | 0,1   | 0,1   | 0,2      | 0,02     | 0,1      | 0,02  | 0,03     | 0,02     | 0,02     | 0,02     | 0,03     | 0,01     | 0,2      |       |
| <b>KOH</b>                       | 3  | 55  | 3,8   | 10    | 10       | 1,9      | 5,8      | 0,3   | 0,6      | 0,9      | 1,0      | 0,7      | 0,3      | 18       | N/A      | 1,0   |
|                                  |    | 1,2 | 0,2   | 0,3   | 0,2      | 0,03     | 0,2      | 0,01  | 0,04     | 0,03     | 0,1      | 0,03     | 0,00     | 0,3      |          | 0,1   |
| <b>Griffiths, BF<sub>3</sub></b> | 3  | 54  | 4,0   | 10    | 10       | 1,9      | 5,6      | 0,3   | 0,6      | 0,8      | 0,9      | 0,6      | 0,3      | 18       | N/A      | 1,0   |
|                                  |    | 1,2 | 0,1   | 0,2   | 0,2      | 0,05     | 0,2      | 0,00  | 0,1      | 0,01     | 0,01     | 0,03     | 0,03     | 0,04     | 0,7      |       |
| <b>Christie</b>                  | 3  | 57  | 4,2   | 10    | 11       | 2,0      | 6,0      | 0,3   | 0,5      | 0,9      | 1,0      | 0,7      | 0,3      | 19       | N/A      | 1,0   |
|                                  |    | 1,0 | 0,3   | 0,1   | 0,2      | 0,04     | 0,1      | 0,02  | 0,02     | 0,01     | 0,01     | 0,04     | 0,03     | 0,01     | 0,2      |       |
| <b>Lewis et al.</b>              | 3  | 58  | 4,7   | 10    | 11       | 2,0      | 6,0      | 0,3   | 0,5      | 0,9      | 1,0      | 0,7      | 0,3      | 19       | N/A      | 1,5   |
|                                  |    | 1,2 | 0,3   | 0,2   | 0,3      | 0,05     | 0,1      | 0,01  | 0,02     | 0,01     | 0,01     | 0,02     | 0,02     | 0,01     | 0,3      |       |
| <b>HCl</b>                       | 12 | 57  | 4,3   | 10    | 11       | 2,0      | 5,9      | 0,3   | 0,5      | 1,0      | 1,0      | 0,7      | 0,3      | 18       | 1,0      | 1,2   |
|                                  |    | 0,8 | 0,2   | 0,3   | 0,4      | 0,05     | 0,1      | 0,02  | 0,03     | 0,03     | 0,03     | 0,04     | 0,04     | 0,8      | 0,1      | 0,1   |
| <b>HCl, 24</b>                   | 3  | 56  | 4,1   | 10    | 11       | 2,0      | 5,9      | 0,3   | 0,5      | 1,0      | 1,0      | 0,7      | 0,2      | 19       | N/A      | 1,2   |
|                                  |    | 0,3 | 0,1   | 0,1   | 0,09     | 0,01     | 0,1      | 0,01  | 0,02     | 0,02     | 0,02     | 0,00     | 0,06     | 0,1      | 0,04     |       |
